# Supplementary material for: Monomolecular adsorption on nanoparticles with repulsive interactions: a Monte Carlo study
Source: Royal Society of Chemistry journal article supplement (doi:10.1039/c6cp01236a), 2016-01-01
Supplement: c6cp01236a10.pdf [file c6cp01236a10.pdf]

## 1 8. Caption of Supplementary Information

2 Figure IS1: Representative snapshots for a truncated octahedron nanoparticle. The seed  
3 or core are symbolized by yellow spheres ( $N_A=2951$ ) and the adsorbate or shell with  
4 purple spheres. We use the follow notation  $\text{core}_{1925}@\text{shell}_{NB}$ , where NB denote the  
5 number of B particles. The surface of this nanoparticle is formed by facets  $\{100\}$  and  
6  $\{111\}$ , two kind of borders  $\{111-111\}$  and  $\{100-111\}$ , and 24 vertices. In the inset  
7  $\text{core}_{1925}@\text{shell}_{728}$  the adsorbate is deposited in the (111) facets. Each adatoms is linked  
8 with 6 lateral NNs ( $NN_{\text{lat}}$ ) and 3 atoms of the seed ( $NN_{\text{seed}}$ ). In the  $\text{core}_{1925}@\text{shell}_{150}$ , the  
9 adsorbate is deposited in the (100) facets, then  $NN_{\text{lat}}=4$  and  $NN_{\text{seed}}=4$ . But in  
10  $\text{core}_{1925}@\text{shell}_{180}$  the adsorbate is deposited in borders  $\{111-111\}$  and  $\{100-111\}$ . In the  
11 first(second) case the adatoms is linked with  $NN_{\text{lat}}=6$  (5) and  $NN_{\text{seed}}=1$  (2). Finally in  
12  $\text{core}_{1925}@\text{shell}_{24}$  the adsorbate is deposited on the vertices where is linked  $NN_{\text{lat}}=5$  and  
13  $NN_{\text{seed}}=1$ . The table resumes the coordination of this NP.

14 Figure IS2: Representative snapshots of simulations for a ICO-NP with  $n=7$ . a), b) and  
15 c) correspond to the three subplateaus formed in the first plateau, yielding a frustrated  
16 ( $\sqrt{3}\times\sqrt{3}$ ) structure. Is important note how the occupation of the vertices induces the  
17 filling of each facet. Note that even in b), which corresponds to a coverage where the  
18 ( $\sqrt{3}\times\sqrt{3}$ ) structure can cover all the surface, all vertices are not equivalent.

19 Figure SI3: Differential heat for several sizes of ICO-NPs. We observe that for  $n=3, 6$   
20 and 9 only one step is visible at  $\theta=1/3$ . However, for the other cases, multiple steps are  
21 observed. The inset shows a zoom of the first step.

22 Figure IS4: Isotherm for  $n=9$  with  $\delta E=7.0$ . A single plateau at  $\theta=1/3$  and three  
23 different plateaus at  $\theta=2/3$  are clearly observed. Black [white] dots denote sites which  
24 are occupied [empty]. The inset (a) shows a snapshot of the ( $\sqrt{3}\times\sqrt{3}$ ) structure formed  
25 on the ICO. Inset (b) shows a snapshot corresponding to  $\theta=0.667$  (the middle  
26 plateau). The vacancy-particle symmetry is broken.

27 Figure SI5: a) Behavior of the isotherms of a tetrahedron ( $N_A=1771$ ) and a decahedron  
28 ( $N_A=1442$ ) for  $\delta E=7.0$ . In both cases subplateaus are presents around characteristic  
29 coverages. b) Differential heats for the isotherms presented in a). Note in the latter the  
30 occurrence of steps in concordance with the behavior of isotherms.

1 Figure SI6: (Color online) a) Adsorption isotherms corresponding to a CO-NP with  
2  $N_A = 2057$ . b) Normalized distribution of surface clusters at different chemical  
3 potentials, as marked in figure. Note the presence of monomers, trimers, tetramers, etc.  
4 on the surface of the NP.

5 Figure SI7: Compressibility as a function of chemical potential for a CO NP, with  
6  $N_A = 2057$  for different adsorbate-adsorbate interaction energies. Like in the case of ICO-  
7 NPs, it is observed that the maxima are spread as  $\delta E$  increases. Submaxima are  
8 observed.

9 Figure SI8: (Color online) a) Mean square fluctuations as a function of chemical  
10 potential, corresponding to simulations with a truncated octahedron. b) Differential heat  
11 as a function of coverage degree.

12
