# Supplementary figures and images for: Monomolecular adsorption on nanoparticles with repulsive interactions: a Monte Carlo study
Source: Royal Society of Chemistry journal article supplement (doi:10.1039/c6cp01236a), 2016-01-01

Figure IS2

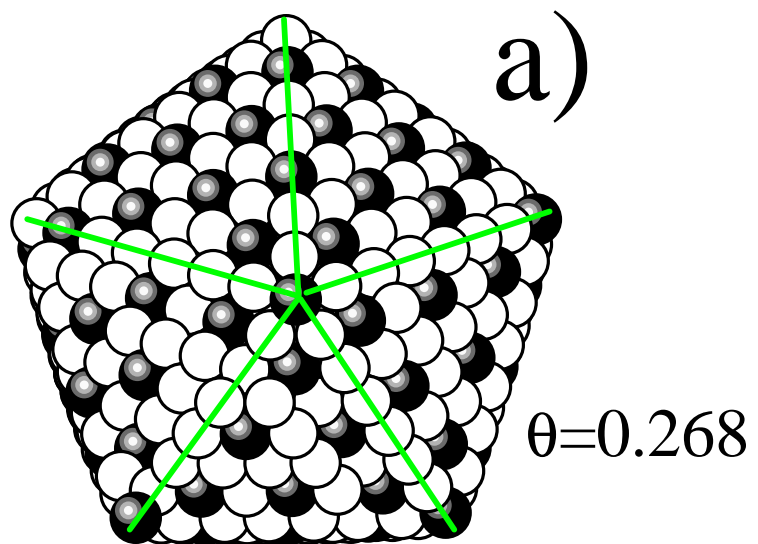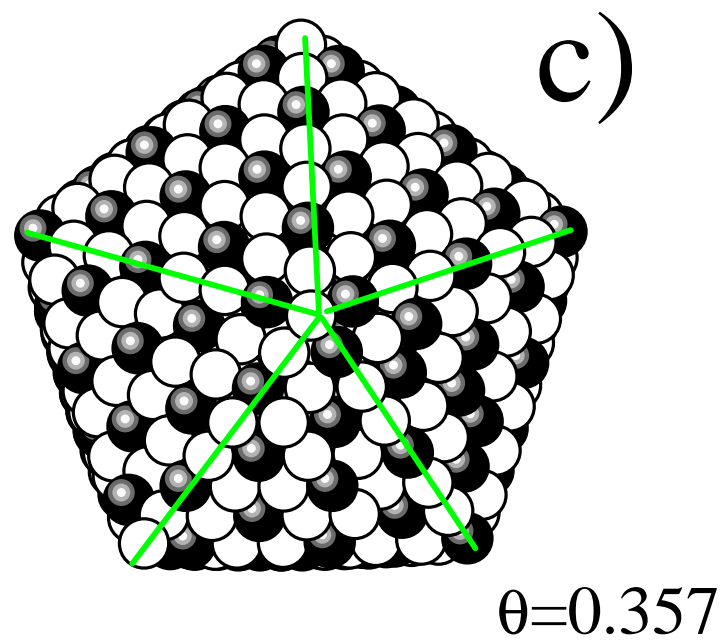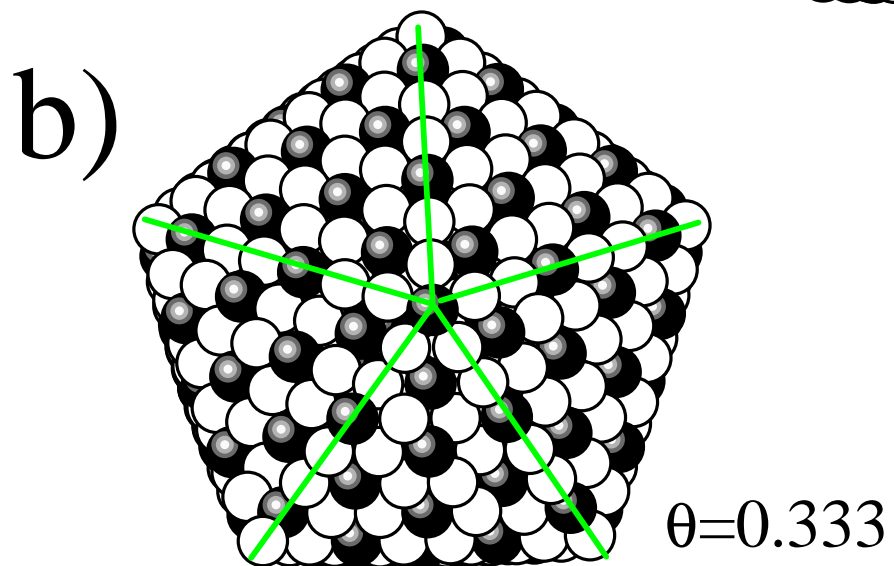

Supplement: c6cp01236a3.pdf [file c6cp01236a3.pdf]

Figure IS4

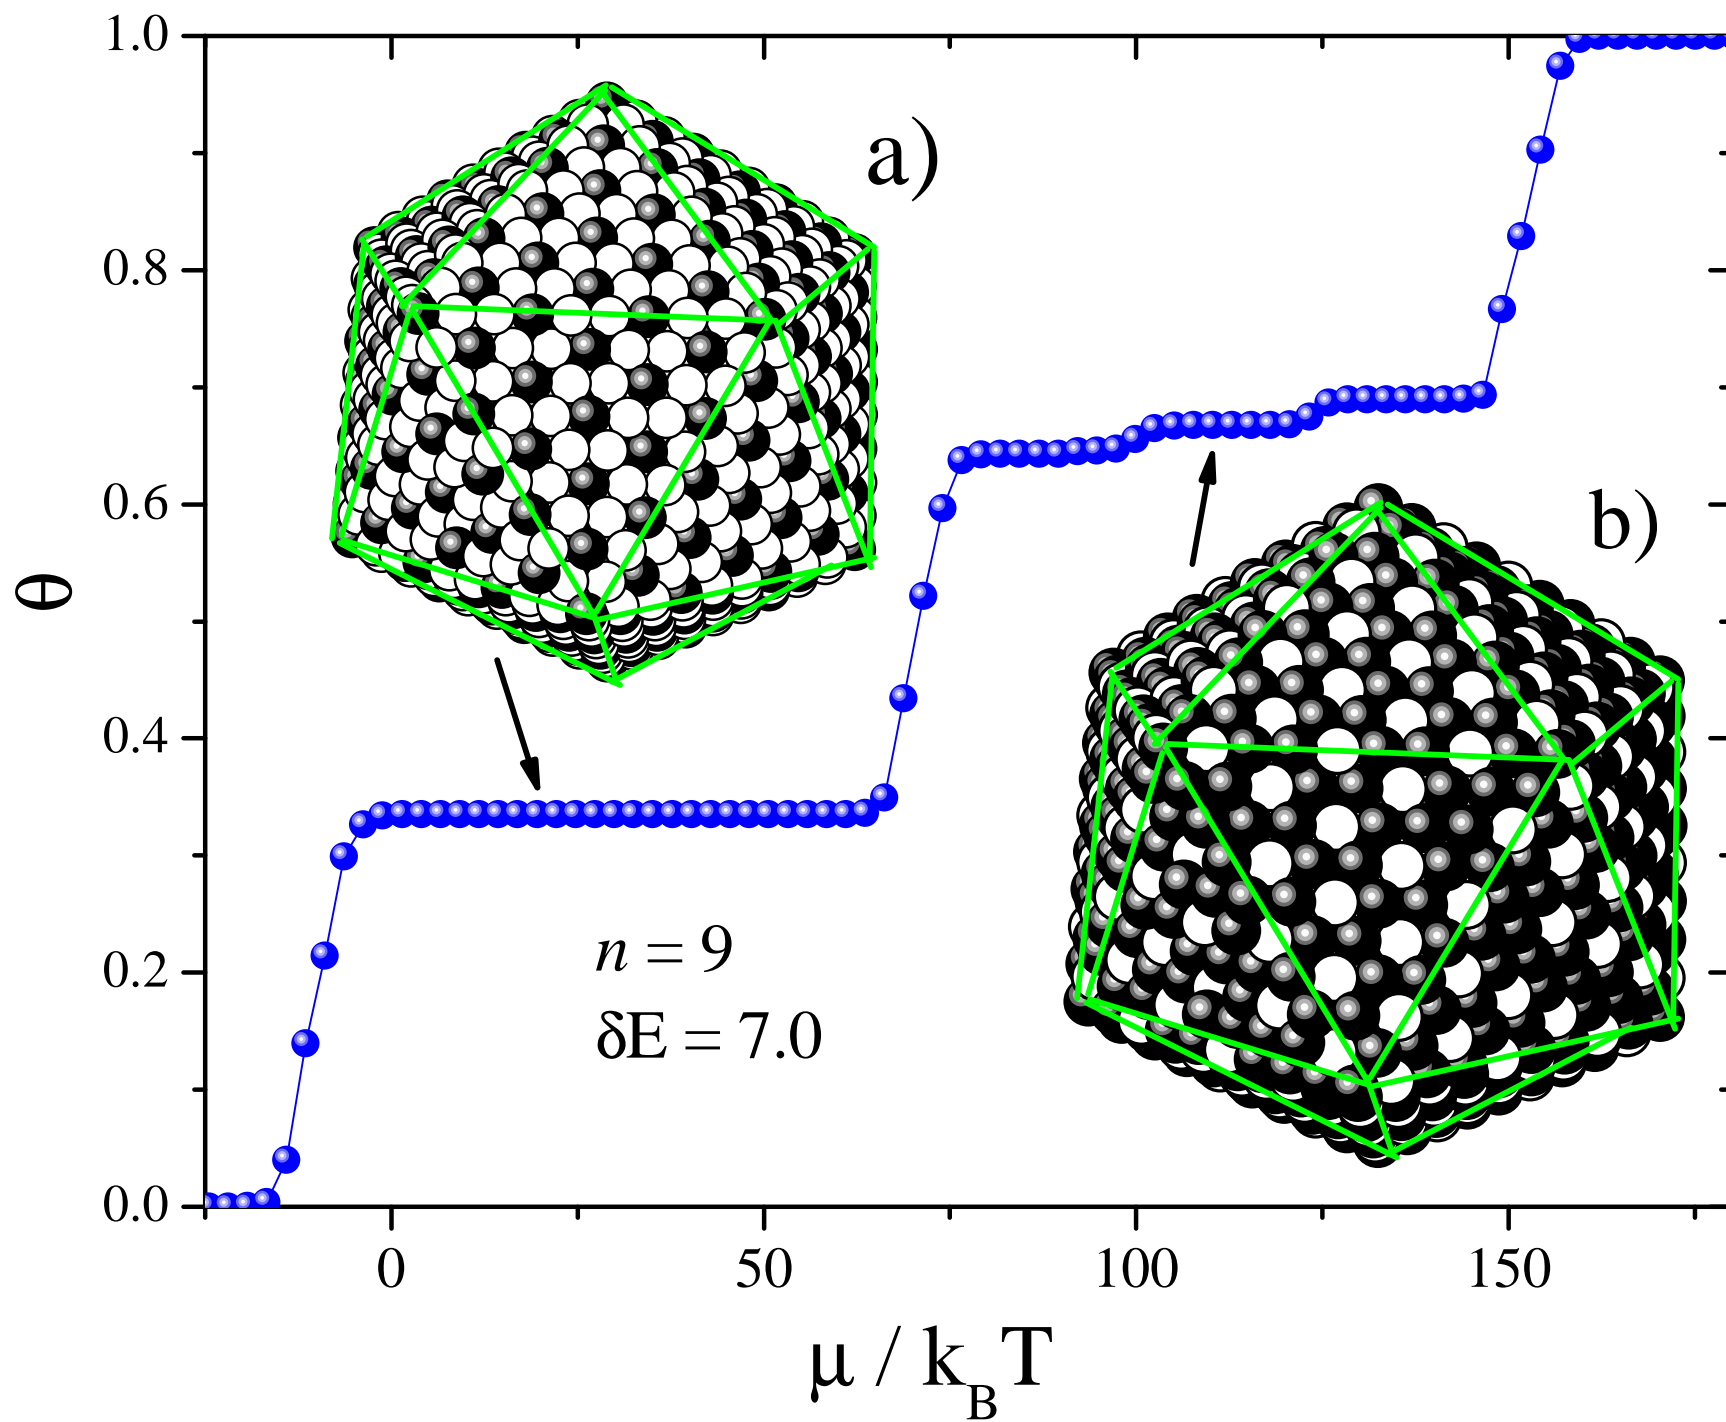

Supplement: c6cp01236a5.pdf [file c6cp01236a5.pdf]

Figure IS5

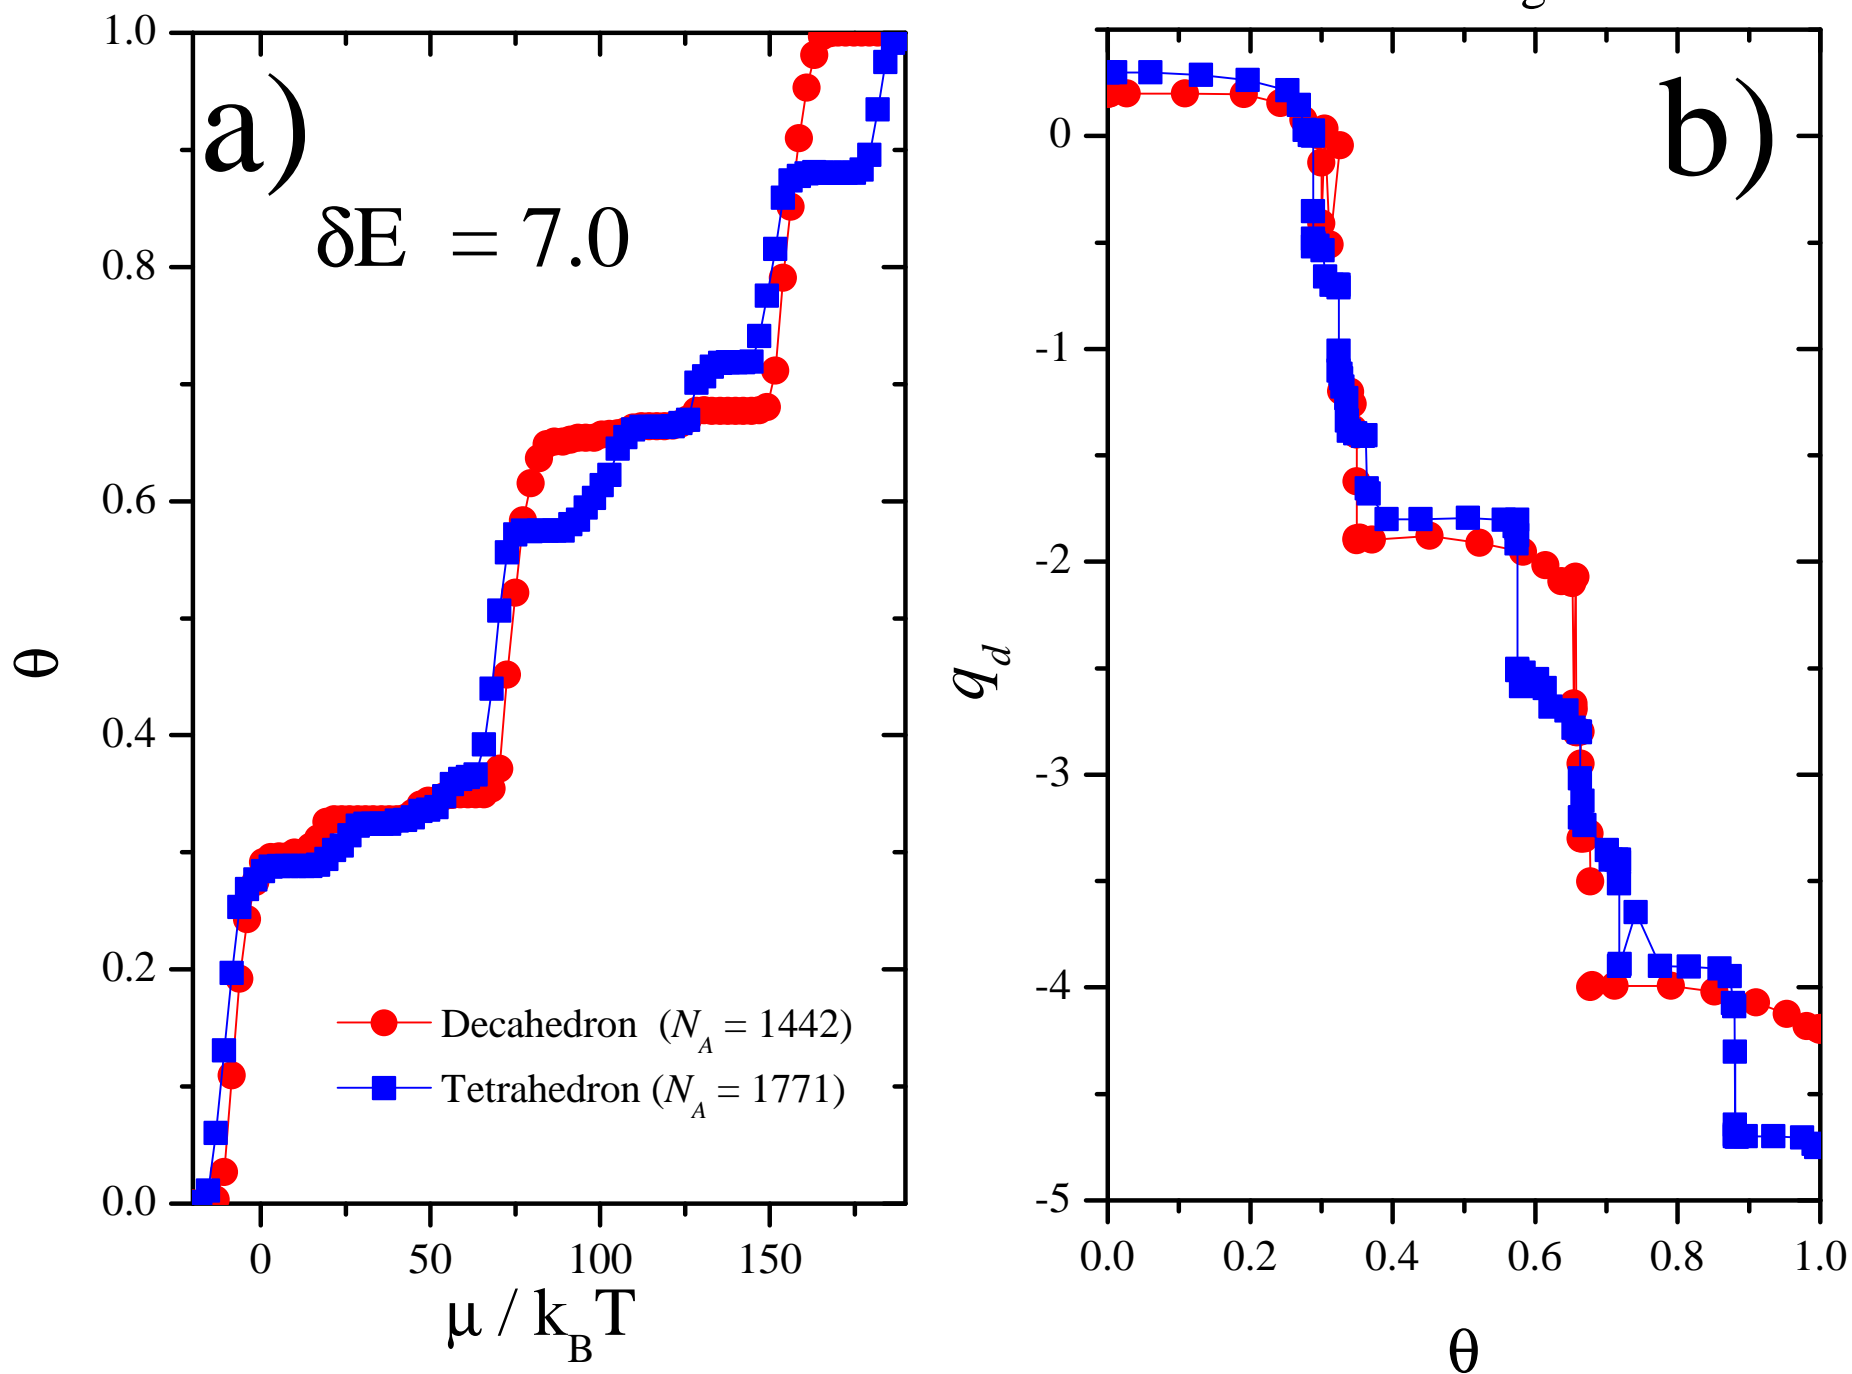

Supplement: c6cp01236a6.pdf [file c6cp01236a6.pdf]
